# Supplementary material
Source: Springer Nature journal article supplement (https://www.springermedizin.de/resource/supplementary/12936_2007_450_MOESM4_ESM.pdf/9547474)
Supplement: MOESM4 [file 9547474]

Quote 1: “But still those questions were good because why leave here and then later blame yourself for having joined? We had ample time on that same day even if you changed your mind to withdraw the child from the study, it was very possible”

Quote 2: “We had understood everything that’s why we had brought our kids. So when we went from inside [screening] and went where we were being asked the questions we were ready to answer them as we were decided and without panic...”
